# Supplementary material for: Parametric soil water retention models: a critical evaluation of expressions for the full moisture range
Source: Copernicus journal article supplement (doi:10.5194/hess-22-1193-2018), 2018-02-12
Supplement: Supplementary file [file hess-22-1193-2018-supplement.pdf]

Supplement of Hydrol. Earth Syst. Sci., 22, 1193–1219, 2018  
<https://doi.org/10.5194/hess-22-1193-2018-supplement>  
© Author(s) 2018. This work is distributed under  
the Creative Commons Attribution 3.0 License.

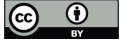

*Supplement of*

## **Parametric soil water retention models: a critical evaluation of expressions for the full moisture range**

**Raneem Madi et al.**

*Correspondence to:* Gerrit Huibert de Rooij ([gerrit.derooij@ufz.de](mailto:gerrit.derooij@ufz.de))

The copyright of individual parts of the supplement might differ from the CC BY 3.0 License.

## S1. Soil water retention and hydraulic conductivity functions

5 This section reviews the most popular parameterizations of the soil water retention curve and several lesser-  
known others that were developed to improve the fit in the dry range or at least eliminate the need for the physically  
poorly defined residual water content. At this time, we consider unimodal functions only. The physical plausibility  
in terms of the rate of change near saturation of the corresponding conductivity models is verified, thereby  
maintaining the consistency between the retention and the conductivity curves that would have been lost in Iden et  
al.'s (2015) approach. In all cases but one, this physical plausibility is checked for the first time. The plausibility  
10 check requires that the derivative of each retention curve is determined and the criterion in Eq. (4) of the is used to  
define the permissible range for  $\kappa$ . If this range does not include any of the values {1, 2} used by the conductivity  
models described above, or if the permitted values are non-physical ( $< 0$ ), the retention model does not have a  
conductivity model associated with it, which limits its practical value. As above,  $h$  denotes the matric potential,  
which is negative in unsaturated soils. Many of the cited papers adopt this notation for its opposite, the suction.

15 The water retention function of Brooks and Corey (1964) is

$$\theta(h) = \begin{cases} \theta_r + (\theta_s - \theta_r) \left( \frac{h}{h_{ae}} \right)^{-\lambda}, & h \leq h_{ae} \\ \theta_s, & h > h_{ae} \end{cases} \quad (\text{S1a})$$

This equation is referred to as BCO below. The derivative is

20

$$\frac{d\theta}{dh} = \begin{cases} -\frac{\lambda(\theta_s - \theta_r)}{h_{ae}} \left( \frac{h}{h_{ae}} \right)^{-\lambda-1}, & h \leq h_{ae} \\ 0, & h > h_{ae} \end{cases} \quad (\text{S1b})$$

where  $\lambda$  is a dimensionless fitting parameter. If  $\theta_r$  is set to zero, Campbell's (1974) equation is obtained.

The analytical expression for the generalized  $K(h)$  function (Eq. (3)) for the water retention function of Brooks and  
25 Corey (1964) is

$$K(h) = \begin{cases} K_s \left( \frac{h(S_e)}{h_{ae}} \right)^{-\lambda\tau} \left\{ \frac{\left[ \frac{\lambda(\theta_s - \theta_r)h_{ae} |h|^\lambda}{\kappa + \lambda + 2} |h|^{-\kappa - \lambda} \right]^h}{\left[ \frac{\lambda(\theta_s - \theta_r)h_{ae} |h|^\lambda}{\kappa + \lambda + 2} |h|^{-\kappa - \lambda} \right]_{-\infty}^{h_{ae}}} \right\}^\gamma & h \leq h_{ae} \\ K_s, & h > h_{ae} \end{cases} = K_s \left( \frac{h_{ae}}{h} \right)^{\lambda(\gamma + \tau) + \gamma\kappa}, \quad (S1c)$$

30 Note that the Brooks-Corey retention curve allows all three parameters of the associated conductivity model to be fitted.

The derivative of the Brooks-Corey function is discontinuous at  $h_{ae}$ . Hutson and Cass (1987) added a parabolic approximation at the wet end to make the first derivative continuous. For  $\theta_r = 0$ , they proposed

$$\theta(h) = \begin{cases} \theta_s \left( \frac{h}{h_{ae}} \right)^{-\lambda}, & h \leq h_i \\ \theta_s \left[ 1 - \left( \frac{h}{h_{ae}} \right)^2 \frac{\left( 1 - \frac{2}{\lambda + 2} \right)}{\left( \frac{2}{\lambda + 2} \right)^{\frac{2}{\lambda}}} \right], & 0 \leq h > h_i \end{cases} \quad (S2a)$$

35

where  $h_i$  [L] is the matric potential at the inflection point, given by:

$$h_i = h_{ae} \left( \frac{2}{2 - \lambda} \right)^{\frac{1}{\lambda}}. \quad (S2b)$$

40 The derivative is

$$\frac{d\theta}{dh} = \begin{cases} -\frac{\lambda\theta_s}{h_{ae}} \left( \frac{h}{h_{ae}} \right)^{-\lambda-1}, & h \leq h_i \\ \frac{2\theta_s}{h_{ae}} \frac{\left( \frac{2}{\lambda + 2} - 1 \right)}{\left( \frac{2}{\lambda + 2} \right)^{\frac{2}{\lambda}}} \left( \frac{h}{h_{ae}} \right), & 0 \leq h > h_i \end{cases} \quad (S2c)$$

45 The parameter  $h_{ae}$  no longer is an air-entry value and should be considered a pure fitting parameter. It should be noted that the smooth transition to saturation that this function and several others mimic may at least in part be caused by the non-zero height of the soil cores used in experiments to determine soil water retention curves. At hydrostatic equilibrium, the matric potential along the vertical varies in the soil core, resulting in a differentiable shape of the apparent soil water retention curve, even if the soil in the core has a uniform air-entry value that leads to a locally non-differentiable curve (Liu and Dane, 1995).

50 The parabolic approximation of Hutson and Cass (1987) leads to the following expression for the term in Eq. (4)

$$\lim_{h \rightarrow 0} A_1 |h|^{1-\kappa} = 0 \quad (\text{S3})$$

55 where  $A_1$  is a constant. This leads to the requirement that  $\kappa < 1$ , ruling out the usual models. Although the parabolic approximation in itself does not preclude the existence of a closed-form expression for  $K$ , the restriction on  $\kappa$  is quite severe, so we do not pursue this further.

Van Genuchten's (1980) formulation is also continuously differentiable:

$$60 \quad \theta(h) = \theta_r + (\theta_s - \theta_r) \left(1 + |\alpha h|^n\right)^{-m}, \quad h \leq 0 \quad (\text{S4a})$$

where  $\alpha$  [ $L^{-1}$ ],  $n$ , and  $m$  are shape parameters. This equation is denoted by VGN below. It has the derivative

$$\frac{d\theta}{dh} = \alpha m n (\theta_s - \theta_r) |\alpha h|^{n-1} \left(1 + |\alpha h|^n\right)^{-m-1}, \quad h \leq 0 \quad (\text{S4b})$$

65 where often  $m$  is set equal to  $1 - 1/n$ .

The limit of the derivative of van Genuchten's (1980) retention curve near saturation is

$$\frac{d\theta}{dh} \Big|_{h=0} = \alpha^n m n (\theta_s - \theta_r) |h|^{n-1} \quad (\text{S5})$$

70 leading to the requirement that  $\kappa < n - 1$ . For many fine and/or poorly sorted soil textures,  $n$  ranges between 1 and 2. Therefore, this restriction can be even more severe than the one required for a parabolic wet end, even excluding Mualem's (1976) conductivity model when  $n < 2$ . For this reason we refrain from formulating analytical conductivity equations, even though van Genuchten (1980) presented such expressions for Burdine's (1953) and Mualem's (1976) models.

Vogel et al. (2001) presented a modification to improve the description of the hydraulic conductivity near saturation without being aware of the physical explanation of the poor behavior presented later by Ippisch et al. (2006). Their retention function reads

$$\theta(h) = \begin{cases} \theta_r + (\theta_m - \theta_r)(1 + |\alpha h|^n)^{-m}, & h < h_s \\ \theta_s, & h \geq h_s \end{cases} \quad (\text{S6a})$$

where  $h_s$  [L] is a fitting parameter close to zero with which  $\theta_m$  can be defined as

$$\theta_m = \theta_r + (\theta_s - \theta_r)(1 + |\alpha h_s|^n)^{-m} \quad (\text{S6b})$$

The derivative is

$$\frac{d\theta}{dh} = \begin{cases} \alpha mn(\theta_m - \theta_r)\alpha h^{n-1}(1 + |\alpha h|^n)^{-m-1}, & h < h_s \\ 0, & h \geq h_s \end{cases} \quad (\text{S6c})$$

Schaap and van Genuchten (2006) reported a value of  $h_s$  of  $-4$  cm to work best for a wide range of soils to improve the description of the near-saturated hydraulic conductivity. The parameter  $h_s$  should therefore not be viewed as an air-entry value.

Although an expression can be derived for  $K(h)$  if  $\kappa$  is set to 1 and  $m = 1 - 1/n$ , we prefer to adopt the formulation by Ippisch et al. (2006), given its solid physical footing. They proposed to introduce an air-entry value and scale the unsaturated portion of the retention curve by its value at the water-entry value:

$$\theta(h) = \begin{cases} \theta_r + (\theta_s - \theta_r) \left( \frac{1 + |\alpha h|^n}{1 + |\alpha h_{ae}|^n} \right)^{-m}, & h < h_{ae} \\ \theta_s, & h \geq h_{ae} \end{cases} \quad (\text{S7a})$$

with derivative

$$\frac{d\theta}{dh} = \begin{cases} \alpha mn(\theta_s - \theta_r)\alpha h^{n-1}(1 + |\alpha h_{ae}|^n)^m(1 + |\alpha h|^n)^{-m-1}, & h < h_{ae} \\ 0, & h \geq h_{ae} \end{cases} \quad (\text{S7b})$$

With the common restriction of  $m = 1 - 1/n$ , an expression can be found for  $\kappa = 1$  that is slightly more general than Eq. (11) in Ippisch et al. (2006):

105

$$K(h) = \begin{cases} K_s \left( \frac{\theta - \theta_r}{\theta_s - \theta_r} \right)^\tau \left[ \frac{1 - \left( 1 - \frac{1}{B(h)} \right)^{\frac{n}{n-1}}}{1 - \left( 1 - \frac{1}{C} \right)^{\frac{n}{n-1}}} \right]^\gamma \\ = K_s \left( \frac{B(h)}{C} \right)^{\tau \left( \frac{1}{n} - 1 \right)} \left[ \frac{1 - \left( 1 - \frac{1}{B(h)} \right)^{\frac{n}{n-1}}}{1 - \left( 1 - \frac{1}{C} \right)^{\frac{n}{n-1}}} \right]^\gamma, & h < h_{ae} \\ K_s, & h \geq h_{ae} \end{cases} \quad (S7c)$$

where

$$B(h) = 1 + |\alpha h|^n \quad (S7d)$$

110

$$C = 1 + |\alpha h_{ae}|^n \quad (S7e)$$

This equation can be used to define conductivity models according to Mualem (1976) and Alexander and Skaggs (1986), which both require that  $\kappa = 1$ .

115

None of the retention models discussed so far performs very well in the dry range. Campbell and Shiozawa (1992) introduced a logarithmic section in the dry end to improve the fit in the dry range:

$$\theta(h) = \theta_a \left( 1 - \frac{\ln|h|}{\ln|h_d|} \right) + A_2 \left( \frac{1}{1 + |\alpha h|^4} \right)^m \quad (S8a)$$

120 with derivative

$$\frac{d\theta}{dh} = \frac{\theta_a}{\ln|h_d|} \frac{1}{h} + 4\alpha m A_2 |\alpha h|^3 \left( 1 + |\alpha h|^4 \right)^{-m-1} \quad (S8b)$$

125 where  $\theta_a$  represents the maximum amount of adsorbed water,  $A_2$  is a constant and  $h_d$  is the matric potential at oven-  
 dryness, below which the water content is assumed to be zero. The first term in the derivative leads to the  
 requirement that  $\kappa < -1$ , and therefore no conductivity model can be derived from Eq. (S8a).

130 Rossi and Nimmo (1994) also preferred a logarithmic function over the Brooks-Corey power law at the dry  
 end to better represent the adsorption processes that dominates water retention in dry soils, as opposed to capillary  
 processes in wetter soils. They also implemented a parabolic shape at the wet end as proposed by Hutson and Cass  
 (1987). Rossi and Nimmo (1994) presented two retention models, but only one (the junction model) permitted an  
 analytical expression of the unsaturated hydraulic conductivity. Here, the junction model is presented with and  
 without the parabolic expression for the wet end of the retention curve. With the discontinuous derivative at the air-  
 entry value, the expression reads

$$135 \quad \theta(h) = \begin{cases} 0, & h \leq h_d \\ \theta_s \beta \ln\left(\frac{h_d}{h}\right), & h_d < h \leq h_j \\ \theta_s \left(\frac{h_{ae}}{h}\right)^\lambda, & h_j < h \leq h_{ae} \\ \theta_s, & h > h_{ae} \end{cases}, \quad (S9a)$$

which is denoted RNA below. The derivative is

$$140 \quad \frac{d\theta}{dh} = \begin{cases} 0, & h \leq h_d \\ \frac{\theta_s \beta}{-h}, & h_d < h \leq h_j \\ \lambda \theta_s \left| \frac{h_{ae}}{h} \right|^\lambda \left| h \right|^{-\lambda-1}, & h_j < h \leq h_{ae} \\ 0, & h > h_{ae} \end{cases} \quad (S9b)$$

Rossi and Nimmo (1994) required the power law and logarithmic branches as well as their first derivatives to be  
 equal at the junction point  $(\theta_j, h_j)$ . With  $h_d$  fixed (Rossi and Nimmo found a value of  $-10^5$  m for six out of seven  
 soils and  $-5 \cdot 10^5$  m for the seventh), these constraints allow two of the five remaining free parameters to be  
 expressed in terms of the other three. Some manipulation leads to the expressions:

$$145 \quad \lambda = \frac{1}{\ln|h_d| - \ln|h_j|} \quad (S9c)$$

$$\beta = \lambda \left( \frac{h_{ae}}{h_j} \right)^\lambda \quad (S9d)$$

150 but other choices are possible. This choice leads to fitting parameters  $h_{ae}$ ,  $h_j$ , and  $\theta_s$ . The associated conductivity model is

$$K(h) = \begin{cases} 0, & h \leq h_d \\ K_s S_e^\tau \left\{ \frac{\left[ -\frac{\theta_s \beta}{\kappa} |h|^{-\kappa} \right]_{h_d}^h}{\left[ -\frac{\theta_s \beta}{\kappa} |h|^{-\kappa} \right]_{h_d}^{h_j} - \left[ \frac{\theta_s \lambda}{\lambda + \kappa} |h_{ae}|^\lambda |h|^{-(\lambda + \kappa)} \right]_{h_j}^{h_{ae}}} \right\}^\gamma \\ = K_s \left[ \beta \ln \left( \frac{h_d}{h} \right) \right]^\tau \left[ \frac{E(h)}{E(h_j) + F \left( |h_j|^{-\lambda - \kappa} - |h_{ae}|^{-\lambda - \kappa} \right)} \right]^\gamma, & h_d < h \leq h_j \\ K_s S_e^\tau \left\{ \frac{\left[ -\frac{\theta_s \beta}{\kappa} |h|^{-\kappa} \right]_{h_d}^{h_j} - \left[ \frac{\theta_s \lambda}{\lambda + \kappa} |h_{ae}|^\lambda |h|^{-(\lambda + \kappa)} \right]_{h_j}^h}{\left[ -\frac{\theta_s \beta}{\kappa} |h|^{-\kappa} \right]_{h_d}^{h_j} - \left[ \frac{\theta_s \lambda}{\lambda + \kappa} |h_{ae}|^\lambda |h|^{-(\lambda + \kappa)} \right]_{h_j}^{h_{ae}}} \right\}^\gamma \\ = K_s \left( \frac{h_{ae}}{h} \right)^{\lambda \tau} \left[ \frac{E(h_j) + F \left( |h_j|^{-\lambda - \kappa} - |h|^{-\lambda - \kappa} \right)}{E(h_j) + F \left( |h_j|^{-\lambda - \kappa} - |h_{ae}|^{-\lambda - \kappa} \right)} \right]^\gamma, & h_j < h \leq h_{ae} \\ K_s, & h > h_{ae} \end{cases} \quad (S9e)$$

where

$$155 \quad E(h) = \frac{\beta}{\kappa} \left( |h_d|^{-\kappa} - |h|^{-\kappa} \right) \quad (S9f)$$

$$F = \frac{\lambda}{\lambda + \kappa} |h_{ae}|^\lambda \quad (S9g)$$

160 It is worth noting that recent studies that considered the conductivity of water films in relatively dry soils show a reduction in the rate at which the  $\log(K)$  dropped with increasing  $\log(-h)$ . This implies that requiring continuity of the first derivative at the junction where  $h = h_j$  could be too strict (e.g. Tuller and Or (2001) and Assouline and Or (2013)).

The junction model of Rossi and Nimmo (1994) with a continuous first-order derivative achieved through the correction by Hutson and Cass (1987) reads

165



$$\theta(h) = \begin{cases} 0, & h \leq h_d \\ \theta_s \zeta_1 \ln\left(\frac{h_d}{h}\right), & h_d < h \leq h_j \\ \theta_s \left(\frac{h_{ae}}{h}\right)^\lambda, & h_j < h \leq h_i \\ \theta_s \left[1 - c_1 \left(\frac{h}{h_c}\right)^2\right], & h_i \leq h \leq 0 \end{cases} \quad (\text{S10a})$$

with the derivative

$$\frac{d\theta}{dh} = \begin{cases} 0, & h \leq h_d \\ \frac{\theta_s \zeta_1}{-h}, & h_d < h \leq h_j \\ \lambda \theta_s |h_{ae}|^\lambda |h|^{-\lambda-1}, & h_j < h \leq h_i \\ \frac{-2c_1 \theta_s}{h_c^2} h, & h_i \leq h \leq 0 \end{cases} \quad (\text{S10b})$$

where

$$h_i = h_c \left(\frac{\lambda}{2} + 1\right)^{\frac{1}{\lambda}} \quad (\text{S10c})$$

$$h_j = h_d e^{-\frac{1}{\lambda}} \quad (\text{S10d})$$

$$c_1 = \frac{\lambda}{2} \left(\frac{2}{\lambda + 2}\right)^{\frac{\lambda+2}{\lambda}} \quad (\text{S10e})$$

$$\zeta_1 = e \lambda \left(\frac{h_c}{h_d}\right)^\lambda \quad (\text{S10f})$$

180 where  $h_c$  [L] is a fitting parameter, together with  $\lambda$  and  $\theta_s$ . The parabolic wet end restricts  $\kappa$  to values between 0 and 1. For this reason, an expression for the conductivity curve is not derived.

Rossi and Nimmo (1994) also introduced an equation that summed up the power law and logarithmic contributions (the sum model):

185

$$\theta(h) = \begin{cases} 0, & h \leq h_d \\ \theta_s \left[ \left( \frac{h_c}{h} \right)^\lambda - \left( \frac{h_c}{h_d} \right)^\lambda + \zeta_2 \ln \left( \frac{h_d}{h} \right) \right], & h_d \leq h \leq h_i \\ \theta_s \left[ 1 - c_2 \left( \frac{h}{h_c} \right)^2 \right], & h_i \leq h \leq 0 \end{cases} \quad (\text{S11a})$$

with derivative

190

$$\frac{d\theta}{dh} = \begin{cases} 0, & h \leq h_d \\ -\frac{\theta_s}{h} \left[ \lambda \left( \frac{h_c}{h} \right)^\lambda + \zeta_2 \right], & h_d \leq h \leq h_i \\ -\frac{2c_2\theta_s}{h_c^2} h, & h_i \leq h \leq 0 \end{cases} \quad (\text{S11b})$$

in which we have

$$\zeta_2 = \left[ 1 - \left( \frac{\lambda}{2} + 1 \right) \left( \frac{h_c}{h_i} \right)^\lambda + \left( \frac{h_c}{h_d} \right)^\lambda \right] \left[ \frac{1}{2} + \ln \left( \frac{h_d}{h_i} \right) \right]^{-1} \quad (\text{S11c})$$

195 and

$$c_2 = \left( \frac{h_c}{h_i} \right)^2 \left[ 1 - \left( \frac{h_c}{h_i} \right)^\lambda + \left( \frac{h_c}{h_d} \right)^\lambda - \frac{1 - \left( \frac{\lambda}{2} + 1 \right) \left( \frac{h_c}{h_i} \right)^\lambda + \left( \frac{h_c}{h_d} \right)^\lambda}{\frac{1}{2 \ln \left( \frac{h_d}{h_i} \right)} + 1} \right] \quad (\text{S11d})$$

A closed-form expression for the hydraulic conductivity does not exist for this function, and the permitted values for  $\kappa$  are not physically acceptable.

200

Fayer and Simmons (1995) used the approach of Campbell and Shiozawa (1992) to have separate terms for adsorbed and capillary bound water. If the capillary binding is represented by a Brooks-Corey type function, the retention model becomes

$$\theta(h) = \begin{cases} 0, & h \leq h_d \\ \theta_a \left( 1 - \frac{\ln|h|}{\ln|h_d|} \right) + \left[ \theta_s - \theta_a \left( 1 - \frac{\ln|h|}{\ln|h_d|} \right) \right] \left( \frac{h_{ae}}{h} \right)^\lambda, & h_d < h < h_{ae} \\ \theta_s, & h \geq h_{ae} \end{cases} \quad (\text{S12a})$$

205

This expression is denoted FSB below. The derivative is

$$\frac{d\theta}{dh} = \begin{cases} 0, & h \leq h_d \\ \frac{1}{|h|} \left( \frac{h_{ae}}{h} \right)^\lambda \left[ \lambda(\theta_s - \theta_a) + \theta_a \left( \frac{\ln|h|}{\ln|h_d|} - \frac{1}{\ln|h_d|} \right) \right], & h_d < h < h_{ae} \\ 0, & h \geq h_{ae} \end{cases} \quad (\text{S12b})$$

210 The corresponding conductivity model is

$$K(h) = \begin{cases} 0, & h \leq h_d \\ K_s S_e^\tau \left\{ \frac{\left[ \frac{|h_{ae}|^\lambda}{\ln|h_d|(\lambda + \kappa)} \left[ \theta_a \left( \frac{\lambda + \kappa - 1}{\lambda + \kappa} - \ln|h| \right) - \lambda(\theta_s - \theta_a) \ln|h_d| \right] |h|^{-\lambda - \kappa} \right]_{h_d}^h}{\left[ \frac{|h_{ae}|^\lambda}{\ln|h_d|(\lambda + \kappa)} \left[ \theta_a \left( \frac{\lambda + \kappa - 1}{\lambda + \kappa} - \ln|h| \right) - \lambda(\theta_s - \theta_a) \ln|h_d| \right] |h|^{-\lambda - \kappa} \right]_{h_d}^{h_{ae}}} \right\}^\gamma, & h_d < h \leq h_{ae} \\ K_s \left\{ \frac{\theta_a \left( 1 - \frac{\ln|h|}{\ln|h_d|} \right) + \left[ 1 - \frac{\theta_a \left( 1 - \frac{\ln|h|}{\ln|h_d|} \right)}{\theta_s} \right] \left( \frac{h_{ae}}{h} \right)^\lambda}{\theta_s} \right\}^\tau \frac{\left[ \frac{[\theta_a(G - \ln|h|) - I] |h|^{-\lambda - \kappa} - J}{[\theta_a(G - \ln|h_{ae}|) - I] |h_{ae}|^{-\lambda - \kappa} - J} \right]^\gamma}{K_s}, & h \geq h_{ae} \end{cases} \quad (\text{S12c})$$

where

215

$$G = \frac{\lambda + \kappa - 1}{\lambda + \kappa} \quad (\text{S12d})$$

$$I = \lambda(\theta_s - \theta_a) \ln|h_d| \quad (\text{S12e})$$

$$J = [\theta_a(G - \ln|h_d|) - I] h_d^{-\lambda - \kappa} \quad (\text{S12f})$$

Note that the above model is valid if  $h_{ae}$  does not exceed  $-1$  cm. This condition will usually be met, unless the soil texture is very coarse.

If capillary binding is described by a van Genuchten function, the resulting equation is

$$\theta(h) = \begin{cases} 0, & h \leq h_d \\ \theta_a \left[ 1 - \frac{\ln|h|}{\ln|h_d|} \right] + \left\{ \theta_s - \theta_a \left[ 1 - \frac{\ln|h|}{\ln|h_d|} \right] \right\} \left[ 1 + (-\alpha h)^n \right]^{\frac{1}{n}-1}, & h_d < h < 0 \end{cases} \quad (\text{S13a})$$

with derivative

$$\frac{d\theta}{dh} = \begin{cases} 0, & h \leq h_d \\ \frac{\theta_a}{h \ln|h_d|} \left\{ \left[ 1 + (-\alpha h)^n \right]^{\frac{1}{n}-1} - 1 \right\} \\ + \alpha(1-n)(-\alpha h)^{n-1} \left[ 1 + (-\alpha h)^n \right]^{\frac{1}{n}-2} \left\{ \theta_a \left[ 1 - \frac{\ln|h|}{\ln|h_d|} \right] - \theta_s \right\}, & h_d < h < 0 \end{cases} \quad (\text{S13b})$$

The derivative has several terms that pose severe restrictions on the value of  $\kappa$  (the first term even requires that  $\kappa < -1$ ), and other terms that limit the permitted values of  $n$ . The conductivity function is therefore omitted here.

In the original equations of both versions as presented by Fayer and Simmons (1995), the adsorbed water content reached zero at  $h_d$ , while there is still some capillary bound water at and below that matric potential, which is inconsistent. Furthermore, the terms with ratios of logarithms become negative for matric potentials below  $h_d$ . We therefore modified the original equations by setting the water content to zero below  $h_d$ .

Zhang (2011) presented a logarithmic extension of van Genuchten's (1980) model (Eq. (S4a)) in the dry end that is very similar to Eq. (S13a). The associated hydraulic conductivity model was the sum of Mualem's (1976) model and an expression for film flow conductivity. This approach only alleviated the issue of the residual water content but had the same problems near saturation as Eq. (S4a), and will therefore not be analyzed further.

Kosugi (1996) and Kosugi (1999) presented a soil water retention curve for soils with a lognormal pore size distribution. Khlosi et al. (2008) extended the approach of Campbell and Schiozawa (1992) and Fayer and Simmons (1995) to Kosugi's (1996, 1999) model. We again set the water content to zero for matric potentials below  $h_d$ :

$$\theta(h) = \begin{cases} 0, & h \leq h_d \\ \theta_a \left(1 - \frac{\ln|h|}{\ln|h_d|}\right) + \left[\theta_s - \theta_a \left(1 - \frac{\ln|h|}{\ln|h_d|}\right)\right] \frac{1}{2} \operatorname{erfc} \left[ \frac{\ln\left(\frac{h}{h_m}\right)}{\sigma\sqrt{2}} \right], & h_d < h < 0 \end{cases} \quad (\text{S14a})$$

with the derivative (see Olver et al., 2010, p. 163 and p. 443)

$$\frac{d\theta}{dh} = \begin{cases} 0, & h \leq h_d \\ \frac{\theta_a}{h \ln|h_d|} \left\{ \frac{1}{2} \operatorname{erfc} \left[ \frac{\ln\left(\frac{h}{h_m}\right)}{\sigma\sqrt{2}} \right] - 1 \right\} + \frac{\theta_a \left(1 - \frac{\ln|h|}{\ln|h_d|}\right) - \theta_s}{h\sigma\sqrt{2}\pi} \exp \left\{ - \left[ \frac{\ln\left(\frac{h}{h_m}\right)}{\sigma\sqrt{2}} \right]^2 \right\}, & h_d < h < 0 \end{cases} \quad (\text{S14b})$$

250

Parameter  $h_m$  [L] represents the matric potential corresponding to the median pore size, and  $\sigma$  characterizes the width of the pore size distribution. The behavior of the derivative near saturation is not readily clear. Expressions for the corresponding hydraulic conductivity function can only be found for integer values of  $\kappa$ . For  $\kappa = 1$ , the expression

255

for the hydraulic conductivity is

$$K(h) = \begin{cases} 0, & h \leq h_d \\ K_s S_e^\tau \left\{ \left[ \frac{\theta_a}{2\theta_s |h_m| \ln|h_d|} \left\{ \begin{aligned} & e^{L^2} \operatorname{erf}(P(h) + L) + \frac{h_m}{h} [\operatorname{erfc}(P(h)) - 2] - \\ & M_1 e^{L^2} \operatorname{erf}(P(h) + L) - \frac{2Lh_m}{h\sqrt{\pi}} e^{-P^2(h)} \end{aligned} \right\} \right]_{h_d}^h \right\}^\gamma \\ \left[ \frac{\theta_a}{2\theta_s |h_m| \ln|h_d|} \left\{ \begin{aligned} & e^{L^2} \operatorname{erf}(P(h) + L) + \frac{h_m}{h} [\operatorname{erfc}(P(h)) - 2] - \\ & M_1 e^{L^2} \operatorname{erf}(P(h) + L) - \frac{2Lh_m}{h\sqrt{\pi}} e^{-P^2(h)} \end{aligned} \right\} \right]_{h_d}^0 \right\} \\ = K_s S_e^\tau \left\{ \begin{aligned} & e^{L^2} [\operatorname{erf}(P(h) + L) - \operatorname{erf}(P(h_d) + L)] + \\ & h_m \left[ \frac{\operatorname{erfc}(P(h)) - 2}{h} - \frac{\operatorname{erfc}(P(h_d)) - 2}{h_d} \right] - \\ & M_1 e^{L^2} [\operatorname{erf}(P(h) + L) - \operatorname{erf}(P(h_d) + L)] - \\ & \frac{2Lh_m}{\sqrt{\pi}} \left( \frac{e^{-P^2(h)}}{h} - \frac{e^{-P^2(h_d)}}{h_d} \right) \end{aligned} \right\}^\gamma, & h_d < h \leq 0 \\ \left. \begin{aligned} & - e^{L^2} [1 + \operatorname{erf}(P(h_d) + L)] + \\ & h_m \left[ \frac{\operatorname{erfc}(P(0)) - 2}{0} - \frac{\operatorname{erfc}(P(h_d)) - 2}{h_d} \right] + \\ & M_1 e^{L^2} [1 + \operatorname{erf}(P(h_d) + L)] - \frac{2Lh_m}{\sqrt{\pi}} \left( \frac{e^{-P^2(0)}}{0} - \frac{e^{-P^2(h_d)}}{h_d} \right) \end{aligned} \right\} \end{cases} \quad (S14c)$$

260 where  $S_e$  is obtained by dividing Eq. (S14a) by  $\theta_s$ . The following functions and derived variables have been used for clarity:

$$L = \frac{\sigma\sqrt{2}}{2} \quad (S14d)$$

$$P(h) = \frac{\ln\left(\frac{h}{h_m}\right)}{\sigma\sqrt{2}} \quad (S14e)$$

$$M_1 = \left(1 - \frac{\theta_s}{\theta_a}\right) \ln|h_d| - \ln|h_m| + \sigma^2 \quad (\text{S14f})$$

For  $\kappa = 2$ , the expression for the hydraulic conductivity reads:

$$K(h) = \begin{cases} 0, & h \leq h_d \\ K_s S_e^\tau \left\{ \left[ \frac{\theta_a}{2\theta_s h_m^2 \ln|h_d|} \left\{ \frac{e^{4L^2} \operatorname{erf}(P(h) + 2L)}{2} + \frac{1}{2} \left(\frac{h_m}{h}\right)^2 [\operatorname{erfc}(P(h)) - 2] - \right. \right. \right. \\ \left. \left. \left. M_2 e^{4L^2} \operatorname{erf}(P(h) + 2L) - \frac{2Lh_m^2}{h^2 \sqrt{\pi}} e^{-P^2(h)} \right\} \right]_{h_d}^h \right\}^\gamma, & h \leq h_d \\ \\ K_s S_e^\tau \left\{ \left[ \frac{\theta_a}{2\theta_s h_m^2 \ln|h_d|} \left\{ \frac{e^{4L^2} \operatorname{erf}(P(h) + 2L)}{2} + \frac{1}{2} \left(\frac{h_m}{h}\right)^2 [\operatorname{erfc}(P(h)) - 2] - \right. \right. \right. \\ \left. \left. \left. M_2 e^{4L^2} \operatorname{erf}(P(h) + 2L) - \frac{2Lh_m^2}{h^2 \sqrt{\pi}} e^{-P^2(h)} \right\} \right]_{h_d}^0 \right\}^\gamma, & h_d < h \leq 0 \\ \\ = K_s S_e^\tau \left\{ \left[ \frac{e^{4L^2}}{2} [\operatorname{erf}(P(h) + 2L) - \operatorname{erf}(P(h_d) + 2L)] + \right. \right. \\ \frac{h_m^2}{2} \left[ \frac{\operatorname{erfc}(P(h)) - 2}{h^2} - \frac{\operatorname{erfc}(P(h_d)) - 2}{h_d^2} \right] - \\ M_2 e^{4L^2} [\operatorname{erf}(P(h) + 2L) - \operatorname{erf}(P(h_d) + 2L)] - \\ \left. \frac{2Lh_m^2}{\sqrt{\pi}} \left( \frac{e^{-P^2(h)}}{h^2} - \frac{e^{-P^2(h_d)}}{h_d^2} \right) \right]_{h_d}^h \right\}^\gamma, & h_d < h \leq 0 \\ \\ - \frac{e^{4L^2}}{2} [1 + \operatorname{erf}(P(h_d) + 2L)] + \\ \frac{h_m^2}{2} \left[ \frac{\operatorname{erfc}(P(0)) - 2}{0^2} - \frac{\operatorname{erfc}(P(h_d)) - 2}{h_d^2} \right] + \\ M_2 e^{4L^2} [1 + \operatorname{erf}(P(h_d) + 2L)] - \frac{2Lh_m^2}{\sqrt{\pi}} \left( \frac{e^{-P^2(0)}}{0^2} - \frac{e^{-P^2(h_d)}}{h_d^2} \right) \right]_{h_d}^0 \right\}^\gamma, & h_d < h \leq 0 \end{cases} \quad (\text{S14g})$$

270 with

$$M_2 = \left(1 - \frac{\theta_s}{\theta_a}\right) \ln|h_d| - \ln|h_m| + 2\sigma^2 \quad (\text{S14h})$$

275 There are several terms with zero in the denominator in Eqs. (S14c) and (S14h). In these terms, the numerator is zero as well. The terms  $\exp(P^{-2}(h)) \cdot h^{-1}$  and  $\exp(P^{-2}(h)) \cdot h^{-2}$  appearing in Eqs. (S14c) and (S14h) both become infinite for all physically acceptable values of  $h_m$  and  $\sigma$ . As a consequence, the unsaturated hydraulic conductivity for both values of  $\kappa$  suffers from the non-realistic increase near saturation diagnosed by Ippisch et al. (2006) for van Genuchten's (1980) soil water retention model, and the use of Eqs. (S14c-h) is not recommended.

Groenevelt and Grant (2004) proposed:

$$\theta(h) = \begin{cases} 0, & h \leq -10^{6.9} \text{ cm} \\ g_1 \left\{ \exp\left(\frac{-g_0}{6.9^\eta}\right) - \exp\left[\frac{-g_0}{(\log_{10}|h|)^\eta}\right] \right\}, & -10^{6.9} \leq h \leq -1 \text{ cm} \\ g_1 \exp\left(\frac{-g_0}{6.9^\eta}\right), & h \geq -1 \text{ cm} \end{cases} \quad (\text{S15a})$$

280 where  $g_0$ ,  $g_1$ , and  $\eta$  are fitting parameters. The constant water content for matric potentials larger than  $-1\text{cm}$  is imposed. Groenevelt and Grant (2004) proposed a more flexible curve-shifting approach, but that procedure is cumbersome to perform in a global search parameter fitting operation. The derivative is

$$\frac{d\theta}{dh} = \begin{cases} 0, & h \leq -10^{6.9} \text{ cm} \\ \frac{g_0 g_1 \eta [\ln(10)]^\eta}{|h| (\ln|h|)^{\eta+1}} \exp\left\{ \frac{-g_0 [\ln(10)]^\eta}{(\ln|h|)^\eta} \right\}, & -10^{6.9} \leq h \leq -1 \text{ cm} \\ 0, & h \geq -1 \text{ cm} \end{cases} \quad (\text{S15b})$$

This expression does not permit a closed-form expression for the hydraulic conductivity function.

290 Peters (2013) introduced four soil water retention models. He used a logarithmic model for adsorbed water that differed from that of Campbell and Shiozawa (1992) and the capillary model of either van Genuchten (1980) or Kosugi (1999). He developed versions for which the water content could be non-zero at the oven-dry matric potential  $h_d$ , which is incorrect but permits closed-form expressions of the hydraulic conductivity function. He also presented versions for which the water content is forced to be zero at  $h_d$ .

For the versions with nonzero water contents at  $h_d$ , the capillary bound and adsorbed water contents are added (Peters, 2013, Eq. (2))

$$295 \quad S_e(h) = w S^{cap}(h) + (1-w) S^{ad}(h) \quad (\text{S16})$$



where the superscripts *cap* and *ad* reflect capillary bound and adsorbed water, respectively, and  $w$  is a weighting factor ranging between 0 and 1. The van Genuchten-version with non-zero water content at  $h_d$  is

300

$$\theta(h) = \begin{cases} \theta_s w \left[ 1 + (-\alpha h)^n \right]^{\frac{1}{n}-1} + \theta_s (1-w) \frac{1 - \frac{\ln\left(1 + \frac{h}{h_a}\right)}{\ln\left(1 + \frac{h_d}{h_a}\right)}}{1 - \frac{\ln(2)}{\ln\left(1 + \frac{h_d}{h_a}\right)}}, & h_d \leq h \leq h_a \\ \theta_s w \left[ 1 + (-\alpha h)^n \right]^{\frac{1}{n}-1} + \theta_s (1-w), & 0 \geq h \geq h_a \end{cases} \quad (\text{S17a})$$

with derivative

305

$$\frac{d\theta}{dh} = \begin{cases} -\theta_s w \alpha (1-n) (-\alpha h)^{n-1} \left[ 1 + (-\alpha h)^n \right]^{\frac{1}{n}-2} + \frac{\theta_s (1-w)}{h+h_a} \frac{1}{\ln\left(1 + \frac{h_d}{h_a}\right) - \ln(2)}, & h \leq h_a \\ -\theta_s w \alpha (1-n) (-\alpha h)^{n-1} \left[ 1 + (-\alpha h)^n \right]^{\frac{1}{n}-2}, & 0 \geq h \geq h_a \end{cases} \quad (\text{S17b})$$

The parameter  $h_a$  [L] represents the matric potential at which the soil reaches the maximum adsorbed water content.

The Kosugi-version with non-zero water content at air-dryness is

310

$$\theta(h) = \begin{cases} \frac{\theta_s w}{2} \operatorname{erfc} \left[ \frac{\ln\left(\frac{h}{h_m}\right)}{\sigma\sqrt{2}} \right] + \theta_s (1-w) \frac{1 - \frac{\ln\left(1 + \frac{h}{h_a}\right)}{\ln\left(1 + \frac{h_d}{h_a}\right)}}{1 - \frac{\ln(2)}{\ln\left(1 + \frac{h_d}{h_a}\right)}}, & h_d \leq h \leq h_a \\ \frac{\theta_s w}{2} \operatorname{erfc} \left[ \frac{\ln\left(\frac{h}{h_m}\right)}{\sigma\sqrt{2}} \right] + \theta_s (1-w), & 0 \geq h \geq h_a \end{cases} \quad (\text{S18a})$$

with derivative

$$\frac{d\theta}{dh} = \begin{cases} -\frac{\theta_s w}{h\sigma\sqrt{2\pi}} \exp\left\{-\left[\frac{\ln\left(\frac{h}{h_m}\right)}{\sigma\sqrt{2}}\right]^2\right\} + \frac{\theta_s(1-w)}{h+h_a} \frac{1}{\ln\left(1+\frac{h_d}{h_a}\right) - \ln(2)}, & h \leq h_a \\ -\frac{\theta_s w}{h\sigma\sqrt{2\pi}} \exp\left\{-\left[\frac{\ln\left(\frac{h}{h_m}\right)}{\sigma\sqrt{2}}\right]^2\right\}, & 0 \geq h \geq h_a \end{cases} \quad (\text{S18b})$$

315

The van Genuchten-version with zero water content when the soil is air dry is

$$\theta(h) = \begin{cases} 0, & h \leq h_d \\ \theta_s \left( w \left\{ \left[ 1 + (-\alpha h)^n \right]^{\frac{1}{n}-1} - 1 \right\} + 1 \right) \frac{1 - \frac{\ln\left(1+\frac{h}{h_a}\right)}{\ln\left(1+\frac{h_d}{h_a}\right)}}{1 - \frac{\ln(2)}{\ln\left(1+\frac{h_d}{h_a}\right)}}, & h_d \leq h \leq h_a \\ \theta_s w \left[ 1 + (-\alpha h)^n \right]^{\frac{1}{n}-1} + \theta_s(1-w), & 0 \geq h \geq h_a \end{cases} \quad (\text{S19a})$$

320 with derivative

$$\frac{d\theta}{dh} = \begin{cases} 0, & h \leq h_d \\ -\theta_s w \alpha (1-n) (-\alpha h)^{n-1} \left[1 + (-\alpha h)^n\right]^{\frac{1}{n}-2} \frac{1 - \frac{\ln\left(1 + \frac{h}{h_a}\right)}{\ln\left(1 + \frac{h_d}{h_a}\right)}}{1 - \frac{\ln(2)}{\ln\left(1 + \frac{h_d}{h_a}\right)}}, & h \leq h_d \\ \frac{\theta_s \left( w \left\{ \left[1 + (-\alpha h)^n\right]^{\frac{1}{n}-1} - 1 \right\} + 1 \right)}{(h + h_a) \left[ \ln\left(1 + \frac{h_d}{h_a}\right) - \ln(2) \right]}, & h \leq h_d \\ -\theta_s w \alpha (1-n) (-\alpha h)^{n-1} \left[1 + (-\alpha h)^n\right]^{\frac{1}{n}-2}, & 0 \geq h \geq h_a \end{cases} \quad (\text{S19b})$$

The Kosugi-version with zero water content at  $h_d$  is

325

$$\theta(h) = \begin{cases} 0, & h \leq h_d \\ \theta_s \left( w \left\{ \frac{1}{2} \operatorname{erfc} \left[ \frac{\ln\left(\frac{h}{h_m}\right)}{\sigma\sqrt{2}} \right] - 1 \right\} + 1 \right) \frac{1 - \frac{\ln\left(1 + \frac{h}{h_a}\right)}{\ln\left(1 + \frac{h_d}{h_a}\right)}}{1 - \frac{\ln(2)}{\ln\left(1 + \frac{h_d}{h_a}\right)}}, & h_d \leq h \leq h_a \\ \frac{\theta_s w}{2} \operatorname{erfc} \left[ \frac{\ln\left(\frac{h}{h_m}\right)}{\sigma\sqrt{2}} \right] + \theta_s (1-w), & 0 \geq h \geq h_a \end{cases} \quad (\text{S20a})$$

with derivative

$$\begin{aligned}
\frac{d\theta}{dh} = & \begin{cases} 0, & h \leq h_d \\ -\frac{\theta_s w}{h\sigma\sqrt{2\pi}} \exp\left\{-\left[\frac{\ln\left(\frac{h}{h_m}\right)}{\sigma\sqrt{2}}\right]^2\right\} \frac{1 - \frac{\ln\left(1 + \frac{h}{h_a}\right)}{\ln\left(1 + \frac{h_d}{h_a}\right)}}{1 - \frac{\ln(2)}{\ln\left(1 + \frac{h_d}{h_a}\right)}}, & h \leq h_a \\ + \left( w \left\{ \frac{1}{2} \operatorname{erfc}\left[\frac{\ln\left(\frac{h}{h_m}\right)}{\sigma\sqrt{2}}\right] - 1 \right\} + 1 \right) \frac{\theta_s}{(h + h_a) \left[ \ln\left(1 + \frac{h_d}{h_a}\right) - \ln(2) \right]}, & h \leq h_a \\ -\frac{\theta_s w}{h\sigma\sqrt{2\pi}} \exp\left\{-\left[\frac{\ln\left(\frac{h}{h_m}\right)}{\sigma\sqrt{2}}\right]^2\right\}, & 0 \geq h \geq h_a \end{cases} \\
\end{aligned} \tag{S20b}$$

330

335

Both water retention functions based on van Genuchten's (1980) model (Eqs. (S17a) and (S19a)) lead to the requirement that  $\kappa$  be smaller than  $n - 1$  (see Eq. (9)) and therefore do only have a physically acceptable conductivity curve associated with them for a very limited range of  $\kappa$ . The Kosugi-based versions (Eqs. (S18a) and (S20a)) suffer from the same lack of clarity about the behavior of the derivative as Khlosi et al.'s (2008) modified Kosugi function and require integer values of  $\kappa$ . Because of these limitations and the unwieldy nature of the equations (compare Eqs. (S14c-h)), their practical value seems limited.

340

Iden and Durner (2014) proposed modifications of Peters' (2013) models that permitted an analytical expression for the conductivity function even if the water content was forced to be zero at  $h_d$ . To apply the criterion of Eq. (4) to this modification, we multiply the derivative of their retention curve (their Eq. (3)) for adsorbed water by  $h^{-\kappa}$ :

$$\theta_s |h|^{-\kappa} \frac{dS^{ad}}{dh} = \frac{\theta_s |h|^{-\kappa-1}}{\ln(10) (\log|h_a| - \log|h_d|)} \left[ 1 - \frac{\exp\left(\frac{\log|h_a| - \log|h|}{b}\right)}{1 + \exp\left(\frac{\log|h_a| - \log|h|}{b}\right)} \right] \tag{S21}$$

345 where  $b$  is a shape parameter. High values of  $b$  lead to a sharp transition between the two linear segments in the semi-logarithmic form of the adsorbed water retention curve with different slopes. Iden and Durner recommend values of  $b$  between 0.1 and 0.3.

In the limit as  $h$  approaches zero, Eq. (S21) simplifies to

$$350 \quad \lim_{h \rightarrow 0} \left( \theta_s |h|^{-\kappa} \frac{dS^{ad}}{dh} \right) = \frac{\theta_s |h|^{-\kappa-1}}{\ln(10)(\log|h_a| - \log|h_d|)} \left[ 1 - \frac{\exp\left(\frac{-\log|h|}{b}\right)}{1 + \exp\left(\frac{-\log|h|}{b}\right)} \right] \quad (S22)$$

The approximation in the last term leads to the requirement that  $\kappa < -1$  for the limit to go to zero for any value of  $b$ , but small values of  $b$  allow larger ranges of  $\kappa$ . For  $b = 0.3$ , trial calculations showed that the value in the limit appears to be zero for  $\kappa < 0.2$ , which still rules out the established conductivity models. For  $b = 0.1$ , the limit is zero even for large positive values of  $\kappa$ . It might be recommendable to fix  $b$  at 0.1 instead of treating it as a fitting parameter.

The scaling of the capillary soil water retention curves proposed by Iden and Durner (2014) does not alleviate the problems with the van Genuchten curve near saturation while the Kosugi-function remains unwieldy. Conductivity functions for Peters' (2013) retention models will therefore not be derived.

360 Rudiyanto et al. (2015) developed a hysteretic version of Iden and Durner's (2014) model with the associated conductivity function. While of considerable interest, this model suffers from the same limitation as the original, and it will therefore not be further explored here.

In summary, many of the retention curves examined result in conductivity curves with physically unacceptable behavior near saturation, even though several of these expressions were derived with the explicit purpose of providing closed-form expressions for the hydraulic conductivity. Only the Brooks-Corey function (1964) (BCO, Eq. (S1a)), the junction model of Rossi and Nimmo (1994) without the parabolic correction (RNA, Eq. (S9a)), and the model of Fayer and Simmons (1995) based on the Brooks-Corey (1964) retention function (FSB, Eq. (S12a)) lead to an acceptable conductivity model with full flexibility (three free parameters:  $\kappa$ ,  $\gamma$ ,  $\tau$ ). The modified van Genuchten (1980) retention curve with a distinct air-entry value by Ippisch et al. (2006) (VGA, Eq. 370 (S7a)) leads to a conductivity model with two fitting parameters if  $m = 1 - 1/n$  because  $\kappa = 1$ .

## References

375 Alexander, L. and Skaggs, R. W.: Predicting unsaturated hydraulic conductivity from the soil water characteristic, Trans. Am. Soc. Agric. Eng., 29, 176-184, 1986.

- Brooks, R. H. and Corey, A. T.: Hydraulic properties of porous media, Colorado State Univ., Hydrology Paper No. 3, 27 pp, 1964.
- Burdine, N. T.: Relative permeability calculations from pore size distribution data, Trans. Am. Inst. Min. Metall. Pet. Eng., 198, 71-81, 1953.
- 380 Campbell, G. S.: A simple method for determining unsaturated hydraulic conductivity from moisture retention data, Soil Sci., 117, 311-314, 1974.
- Campbell, G. S., and Shiozawa, S.: Prediction of hydraulic properties of soils using particle-size distribution and bulk density data, In: van Genuchten, M. Th., Leij, F. J., and Lund, L. J. (eds.), Indirect methods for
- 385 estimating the hydraulic properties of unsaturated soils. Univ. of California, Riverside, 317-328, 1992.
- Fayer, M. J. and Simmons, C. S.: Modified soil water retention functions for all matric suctions, Water Resour. Res., 31, 1233-1238, 1995.
- Groenevelt, P. H. and Grant, C. D.: A new model for the soil-water retention curve that solves the problem of residual water contents, European J. of Soil Science, 55, 479-485, doi: 10.1111/j.1365-
- 390 2389.2004.00617.x, 2004.
- Hutson, J. L. and Cass, A.: A retentively functions for use in soil-water simulation models, J. of Soil Sci., 38, 105-113, 1987.
- Iden, S. C., and Durner, W.: Comment on 'Simple consistent models for water retention and hydraulic conductivity in the complete moisture range' by Peters, A. Water Resour. Res., 50, 7530-7534, doi:
- 395 10.1002/2014WR015937, 2014.
- Iden, S. C., Peters, A., and Durner, W.: Improving prediction of hydraulic conductivity by constraining capillary bundle models to a maximum pore size, Adv. Water Resources, 85, 86-92, doi:10.1016/j.advwatres, 2015.09.005, 2015.
- Ippisch, O., Vogel, H. -J., and Bastian, P.: Validity limits for the van Genuchten-Mualem model and
- 400 implications for parameter estimation and numerical simulation, Adv. Water Resources, 29,1780-1789, doi:10.1016/j.advwatres.2005.12.011, 2006.
- Khlosi, M., Cornelis, W. M., Douaik, A., van Genuchten, M. Th. and Gabriels, D.: Performance evaluation of models that describe the soil water retention curve between saturation and oven dryness, Vadose Zone J., 7, 87-96. doi:10.2136/vzj2007.0099, 2008.
- 405 Kosugi, K.: Lognormal distribution model for unsaturated soil hydraulic properties, Water Resour. Res., 32, 2697-2703, 1996.
- Kosugi, K.: General model for unsaturated hydraulic conductivity for soils with lognormal pore-size distribution, Soil Sci. Soc. Am. J., 63, 270-277, 1999.
- Liu, H. H., and Dane, J. H.: Improved computational procedure for retention relations of immiscible fluids using
- 410 pressure cells, Soil Sci. Soc. Am. J., 59, 1520-1524, 1995.
- Mualem, Y.: A new model for predicting the hydraulic conductivity of unsaturated porous media, Water Resour. Res., 12, 513-521, 1976.

- National Agricultural Library: [https://data.nal.usda.gov/dataset/unsoda-20-unsaturated-soil-hydraulic-database-database-and-program-indirect-methods-estimating-unsaturated-hydraulic-properties\\_134](https://data.nal.usda.gov/dataset/unsoda-20-unsaturated-soil-hydraulic-database-database-and-program-indirect-methods-estimating-unsaturated-hydraulic-properties_134), last access 11  
415 September, 2017.
- Nemes, A., Schaap, M. G., Leij, F. J., and Wösten, J. H. M.: Description of the unsaturated soil hydraulic database UNSODA version 2.0, *J. Hydrol.*, 251, 152-162, doi:10.1016/S0022-1694(01)00465-6, 2001.
- Olver, F. W. J., Lozier, D. W., Boisvert, R. F., and Clark, C. W. (Editors): NIST Handbook of mathematical functions. National Institute of Standards and Technology (U.S. Dept. of Commerce), and  
420 Cambridge University Press, Cambridge, UK, 2010.
- Peters, A.: Simple consistent models for water retention and hydraulic conductivity in the complete moisture range, *Water Resour. Res.*, 49, 6765-6780, doi:10.1002/wrcr.20548, 2013.
- Rossi, C., and Nimmo, J. R.: Modeling of soil water retention from saturation to oven dryness, *Water Resour. Res.*, 30, 701-708, 1994.
- 425 Rudiyanto, Sakai, M., van Genuchten, M. Th., Alazba, A. A., Setiawan, B. I., and Minasny, B.: A complete soil hydraulic model accounting for capillary and adsorptive water retention, capillary and film conductivity, and hysteresis, *Water Resour. Res.*, 51, 8757-8772, doi: 10.1002/2015WR017703, 2015.
- Schaap, M. G., and van Genuchten, M. Th.: A modified Mualem-van Genuchten formulation for improved description of the hydraulic conductivity near saturation, *Vadose Zone J.*, 5, 27-34,  
430 doi:10.2136/vzj2005.0005, 2006.
- Tuller, M. and Or, D.: Hydraulic conductivity of variably saturated porous media: Film and corner flow in angular pore space. *Water Resour. Res.*, 37, 1257-1276, doi: 10.1029/2000WR900328, 2001.
- Twarakavi, N. K. C., Šimůnek, J., and Schaap, M. G.: Can texture-based classification optimally classify soils with respect to soil hydraulics? *Water Resour. Res.*, 46, W01501, doi: 10.1029/2009WR007939, 2010.
- 435 van Genuchten, M. Th.: A closed-form equation for predicting the hydraulic conductivity for unsaturated soils, *Soil Sci. Soc. Am. J.*, 44, 892-898, 1980.
- Vogel, T., van Genuchten, M. Th. and Cislerova, M.: Effect of the shape of the soil hydraulic functions near saturation on variably-saturated flow predictions, *Adv. Water Resour.*, 24, 133-144, 2001.
- Zhang, Z. F.: Soil water retention and relative permeability for conditions from oven-dry to full saturation, *Vadose Zone J.*, 10:1299-1308, doi: 10.2136/vzj2011.0019, 2011.  
440

445

## S2. Fitted parameter values for the 21 soils selected from the UNSODA database

455 Table S1: The fitting parameters and their values for five UNSODA (National Agricultural Library, 2017; Nemes et al., 2001) parameterizations for clayey soils. The three-character parameterization label is explained in the main text. The soils are presented in the order of presentation of Fig. S1.

|                  |            |                  | Soil (UNSODA identifier and classification according to Twarakavi et al. (2010)) |         |         |         |          |         |
|------------------|------------|------------------|----------------------------------------------------------------------------------|---------|---------|---------|----------|---------|
|                  |            |                  | 1135 C2                                                                          | 1182 C2 | 1122 C4 | 1123 C4 | 1180 C4  | 1181 C4 |
| Parameterization | Parameter  | Unit             |                                                                                  |         |         |         |          |         |
| BCO              | $\theta_r$ | -                | 4.79E-6                                                                          | 1.10E-4 | 3.76E-4 | 3.01E-4 | 1.63E-4  | 2.33E-5 |
|                  | $\theta_s$ | -                | 0.420                                                                            | 0.549   | 0.362   | 0.358   | 0.497    | 0.456   |
|                  | $h_{ae}$   | cm               | -106                                                                             | -0.980  | -10.0   | -10.0   | -10.9    | -5.17   |
|                  | $\lambda$  | -                | 7.81E-2                                                                          | 4.40E-1 | 3.37E-2 | 2.70E-2 | 5.63E-2  | 5.39E-2 |
| FSB              | $\theta_s$ | -                | 0.420                                                                            | 0.548   | 0.360   | 0.356   | 0.495    | 0.456   |
|                  | $\theta_a$ | -                | 0.400                                                                            | 0.306   | 0.350   | 0.340   | 0.491    | 0.348   |
|                  | $h_{ae}$   | cm               | -106                                                                             | -0.229  | -5.74   | -10.0   | -8.58    | -13.2   |
|                  | $\lambda$  | -                | 0.172                                                                            | 5.63E-2 | 6.59E-2 | 5.70E-2 | 100      | 8.08E-2 |
| RNA              | $\theta_s$ | -                | 0.420                                                                            | 0.549   | 0.370   | 0.370   | 0.497    | 0.456   |
|                  | $h_{ae}$   | cm               | -106                                                                             | -3.62   | -9.99   | -10.0   | -0.149   | -7.63   |
|                  | $h_j$      | cm               | -109                                                                             | -12.3   | -10.7   | -10.7   | -23.8    | -22.0   |
|                  | $h_d$      | cm               | -1.66E8                                                                          | -1.00E9 | -1.00E9 | -1.00E9 | -1.00E9  | -1.00E9 |
| VGA              | $\theta_r$ | -                | 2.48E-2                                                                          | 5.09E-5 | 0.105   | 0.182   | 2.20E-2  | 2.12E-6 |
|                  | $\theta_s$ | -                | 0.418                                                                            | 0.548   | 0.359   | 0.354   | 0.497    | 0.456   |
|                  | $\alpha$   | cm <sup>-1</sup> | 1.59E-3                                                                          | 1.33    | 1.27E-2 | 3.25E-3 | 15.1     | 1.70    |
|                  | $n$        | -                | 1.18                                                                             | 1.05    | 1.08    | 1.16    | 1.06     | 1.05    |
|                  | $h_{ae}$   | cm               | -45.6                                                                            | -0.523  | -2.97   | -9.50   | -6.45E-2 | -4.83   |
| VGN              | $\theta_r$ | -                | 0.270                                                                            | 9.53E-5 | 6.58E-4 | 0.213   | 1.18E-5  | 3.34E-6 |
|                  | $\theta_s$ | -                | 0.412                                                                            | 0.548   | 0.359   | 0.354   | 0.497    | 0.456   |
|                  | $\alpha$   | cm <sup>-1</sup> | 1.02E-3                                                                          | 0.738   | 1.38E-2 | 2.87E-3 | 9.18     | 0.142   |
|                  | $n$        | -                | 2.57                                                                             | 1.05    | 1.05    | 1.22    | 1.06     | 1.06    |



Table S2: The fitting parameters and their values for five parameterizations for silty soils. The three-character parameterization label is explained in the main text. The soils are presented in the order of presentation of Fig. S1.

|                  |            |                  | Soil (UNSODA identifier and classification according to Twarakavi et al. (2010)) |          |         |          |         |          |
|------------------|------------|------------------|----------------------------------------------------------------------------------|----------|---------|----------|---------|----------|
|                  |            |                  | 3260 B2                                                                          | 3261 B2  | 3263 B2 | 3250 B4  | 3251 B4 | 4450 B4  |
| Parameterization | Parameter  | Unit             |                                                                                  |          |         |          |         |          |
| BCO              | $\theta_r$ | -                | 5.45E-6                                                                          | 8.42E-6  | 2.72E-7 | 8.12E-6  | 2.39E-5 | 5.36E-6  |
|                  | $\theta_s$ | -                | 0.470                                                                            | 0.499    | 0.460   | 0.540    | 0.500   | 0.380    |
|                  | $h_{ae}$   | cm               | -28.6                                                                            | -13.5    | -28.8   | -30.5    | -18.2   | -4.82    |
|                  | $\lambda$  | -                | 0.281                                                                            | 0.256    | 0.255   | 0.182    | 9.57E-2 | 9.50E-2  |
| FSB              | $\theta_s$ | -                | 0.470                                                                            | 0.499    | 0.460   | 0.540    | 0.500   | 0.380    |
|                  | $\theta_a$ | -                | 1.42E-5                                                                          | 6.90E-5  | 1.01E-5 | 0.173    | 0.431   | 0.320    |
|                  | $h_{ae}$   | cm               | -28.6                                                                            | -13.5    | -28.8   | -30.0    | -10.9   | -0.888   |
|                  | $\lambda$  | -                | 0.281                                                                            | 0.256    | 0.255   | 0.242    | 0.197   | 0.196    |
| RNA              | $\theta_s$ | -                | 0.470                                                                            | 0.499    | 0.460   | 0.540    | 0.500   | 0.380    |
|                  | $h_{ae}$   | cm               | -28.6                                                                            | -13.5    | -28.8   | -30.5    | -18.2   | -4.81    |
|                  | $h_j$      | cm               | -8.05E4                                                                          | -6.31E4  | -7.76E4 | -6.02E4  | -2.20E4 | -1.69E4  |
|                  | $h_d$      | cm               | -2.82E6                                                                          | -3.14E6  | -3.89E6 | -1.45E7  | -7.66E8 | -6.23E8  |
| VGA              | $\theta_r$ | -                | 5.27E-2                                                                          | 4.89E-2  | 1.02E-3 | 1.58E-2  | 1.20E-4 | 4.77E-4  |
|                  | $\theta_s$ | -                | 0.472                                                                            | 0.491    | 0.458   | 0.540    | 0.500   | 0.379    |
|                  | $\alpha$   | cm <sup>-1</sup> | 1.62E-2                                                                          | 1.84E-2  | 2.59E-2 | 1.311E-2 | 3.57E-2 | 0.164    |
|                  | $n$        | -                | 1.47                                                                             | 1.52     | 1.30    | 1.26     | 1.11    | 1.10     |
|                  | $h_{ae}$   | cm               | -1.66E-3                                                                         | -2.08E-3 | -19.2   | -5.36    | -7.11   | -5.93E-3 |
| VGN              | $\theta_r$ | -                | 5.27E-2                                                                          | 4.88E-2  | 4.52E-2 | 3.11E-2  | 8.93E-6 | 8.91E-5  |
|                  | $\theta_s$ | -                | 0.472                                                                            | 0.491    | 0.461   | 0.540    | 0.501   | 0.379    |
|                  | $\alpha$   | cm <sup>-1</sup> | 1.62E-2                                                                          | 1.84E-2  | 1.53E-2 | 1.21E-2  | 2.61E-2 | 0.164    |
|                  | $n$        | -                | 1.47                                                                             | 1.51     | 1.41    | 1.28     | 1.11    | 1.10     |

Table S3: The fitting parameters and their values for five parameterizations for sandy soils (A3 and A4 soils according to Twarakavi et al., 2010) . The three-character parameterization label is explained in the main text. The soils are presented in the order of presentation of Fig. S1.

|                  |            |                  | Soil (UNSODA identifier and classification according to Twarakavi et al. (2010)) |          |          |          |          |         |
|------------------|------------|------------------|----------------------------------------------------------------------------------|----------|----------|----------|----------|---------|
|                  |            |                  | 1120 A3                                                                          | 1143 A3  | 2110 A3  | 2132 A3  | 1121 A4  | 1133 A4 |
| Parameterization | Parameter  | Unit             |                                                                                  |          |          |          |          |         |
| BCO              | $\theta_r$ | -                | 1.77E-5                                                                          | 4.61E-6  | 2.31E-2  | 5.43E-5  | 2.72E-5  | 1.02E-4 |
|                  | $\theta_s$ | -                | 0.311                                                                            | 0.279    | 0.360    | 0.303    | 0.350    | 0.330   |
|                  | $h_{ae}$   | cm               | -10.0                                                                            | -7.00    | -18.5    | -8.00    | -10.0    | -206    |
|                  | $\lambda$  | -                | 0.204                                                                            | 0.168    | 0.305    | 0.107    | 0.117    | 0.102   |
| FSB              | $\theta_s$ | -                | 0.311                                                                            | 0.279    | 0.360    | 0.308    | 0.346    | 0.330   |
|                  | $\theta_a$ | -                | 5.27E-5                                                                          | 1.95E-4  | 7.30E-2  | 0.298    | 0.324    | 0.310   |
|                  | $h_{ae}$   | cm               | -10.0                                                                            | -7.00    | -18.4    | -3.24    | -10.0    | -206    |
|                  | $\lambda$  | -                | 0.204                                                                            | 0.169    | 0.342    | 0.422    | 0.377    | 0.216   |
| RNA              | $\theta_s$ | -                | 0.311                                                                            | 0.279    | 0.360    | 0.303    | 0.350    | 0.330   |
|                  | $h_{ae}$   | cm               | -10.0                                                                            | -7.00    | -18.0    | -8.00    | -10.0    | -220    |
|                  | $h_j$      | cm               | -8.09E4                                                                          | -7.59E4  | -9.83E4  | -3.90E4  | -7.26E4  | -6.22E4 |
|                  | $h_d$      | cm               | -1.10E7                                                                          | -2.86E7  | -3.78E6  | -4.37E8  | -3.53E8  | -7.96E8 |
| VGA              | $\theta_r$ | -                | 7.21E-2                                                                          | 9.77E-2  | 0.126    | 1.26E-4  | 5.20E-5  | 0.201   |
|                  | $\theta_s$ | -                | 0.305                                                                            | 0.278    | 0.360    | 0.306    | 0.339    | 0.324   |
|                  | $\alpha$   | cm <sup>-1</sup> | 1.72E-2                                                                          | 4.54E-2  | 2.63E-2  | 6.10E-2  | 7.22E-3  | 7.34E-4 |
|                  | $n$        | -                | 1.69                                                                             | 1.52     | 1.84     | 1.14     | 1.27     | 2.99    |
|                  | $h_{ae}$   | cm               | -3.81E-2                                                                         | -6.43E-3 | -1.35E-2 | -3.32E-3 | -5.00E-2 | -25.8   |
| VGN              | $\theta_r$ | -                | 7.21E-2                                                                          | 9.16E-2  | 0.126    | 2.02E-2  | 4.19E-5  | 0.201   |
|                  | $\theta_s$ | -                | 0.304                                                                            | 0.278    | 0.360    | 0.305    | 0.339    | 0.324   |
|                  | $\alpha$   | cm <sup>-1</sup> | 1.72E-2                                                                          | 4.71E-2  | 2.63E-2  | 5.46E-2  | 7.15E-3  | 7.34E-4 |
|                  | $n$        | -                | 1.69                                                                             | 1.48     | 1.84     | 1.16     | 1.26     | 3.02    |

Table S4: The fitting parameters and their values for five parameterizations for sandy soils (A1 and A2 soils according to Twarakavi et al., 2010) . The three-character parameterization label is explained in the main text. The soils are presented in the order of presentation of Fig. S1.

|                  |            |                  | Soil (UNSODA identifier and classification according to Twarakavi et al. (2010)) |         |          |
|------------------|------------|------------------|----------------------------------------------------------------------------------|---------|----------|
|                  |            |                  | 2126 A1                                                                          | 1142 A2 | 2104 A2  |
| Parameterization | Parameter  | Unit             |                                                                                  |         |          |
| BCO              | $\theta_r$ | -                | 1.63E-2                                                                          | 9.36E-5 | 2.27E-2  |
|                  | $\theta_s$ | -                | 0.377                                                                            | 0.250   | 0.398    |
|                  | $h_{ae}$   | cm               | -6.78                                                                            | -7.00   | -6.79    |
|                  | $\lambda$  | -                | 0.846                                                                            | 0.211   | 0.434    |
| FSB              | $\theta_s$ | -                | 0.377                                                                            | 0.250   | 0.398    |
|                  | $\theta_a$ | -                | 2.59E-2                                                                          | 2.96E-4 | 5.46E-2  |
|                  | $h_{ae}$   | cm               | -6.76                                                                            | -7.00   | -6.73    |
|                  | $\lambda$  | -                | 0.862                                                                            | 0.210   | 0.468    |
| RNA              | $\theta_s$ | -                | 0.378                                                                            | 0.250   | 0.398    |
|                  | $h_{ae}$   | cm               | -6.37                                                                            | -7.00   | -6.17    |
|                  | $h_j$      | cm               | -9.08E4                                                                          | -8.17E4 | -7.52E4  |
|                  | $h_d$      | cm               | -3.68E5                                                                          | -9.45E6 | -1.13E6  |
| VGA              | $\theta_r$ | -                | 3.39E-2                                                                          | 9.64E-2 | 3.42E-2  |
|                  | $\theta_s$ | -                | 0.376                                                                            | 0.242   | 0.398    |
|                  | $\alpha$   | cm <sup>-1</sup> | 6.84E-2                                                                          | 1.98E-2 | 6.97E-2  |
|                  | $n$        | -                | 2.73                                                                             | 3.05    | 1.64     |
|                  | $h_{ae}$   | cm               | -3.49E-2                                                                         | -0.246  | -1.62E-2 |
| VGN              | $\theta_r$ | -                | 3.39E-2                                                                          | 9.42E-2 | 3.41E-2  |
|                  | $\theta_s$ | -                | 0.376                                                                            | 0.242   | 0.398    |
|                  | $\alpha$   | cm <sup>-1</sup> | 6.84E-2                                                                          | 1.98E-2 | 6.97E-2  |
|                  | $n$        | -                | 2.73                                                                             | 2.93    | 1.64     |

**S3. Root means square errors of the parameter fits for the 21 soils selected from the UNSODA database**

475 Table S5. Root mean square errors of the parameter fits for the clayey soils.

| Parameterization | Soil (UNSODA identifier and classification according to Twarakavi et al. (2010)) |         |         |         |         |         |
|------------------|----------------------------------------------------------------------------------|---------|---------|---------|---------|---------|
|                  | 1135 C2                                                                          | 1182 C2 | 1122 C4 | 1123 C4 | 1180 C4 | 1181 C4 |
| BCO              | 0.0913                                                                           | 0.0494  | 0.0349  | 0.0489  | 0.0187  | 0.0428  |
| FSB              | 0.0721                                                                           | 0.0441  | 0.0212  | 0.0320  | 0.1196  | 0.0360  |
| RNA              | 0.0812                                                                           | 0.0913  | 0.1235  | 0.1501  | 0.0347  | 0.0570  |
| VGA              | 0.0487                                                                           | 0.0485  | 0.0204  | 0.0243  | 0.0192  | 0.0429  |
| VGN              | 0.0208                                                                           | 0.0488  | 0.0197  | 0.0244  | 0.0194  | 0.0433  |

Table S6. Root mean square errors of the parameter fits for the silty soils.

| Parameterization | Soil (UNSODA identifier and classification according to Twarakavi et al. (2010)) |         |         |         |         |         |
|------------------|----------------------------------------------------------------------------------|---------|---------|---------|---------|---------|
|                  | 3260 B2                                                                          | 3261 B2 | 3263 B2 | 3250 B4 | 3251 B4 | 4450 B4 |
| BCO              | 0.0793                                                                           | 0.1316  | 0.0973  | 0.0822  | 0.0551  | 0.0499  |
| FSB              | 0.0794                                                                           | 0.1316  | 0.0973  | 0.0815  | 0.0395  | 0.0445  |
| RNA              | 0.0793                                                                           | 0.1316  | 0.0973  | 0.0822  | 0.0551  | 0.0499  |
| VGA              | 0.0455                                                                           | 0.0607  | 0.0818  | 0.0413  | 0.0466  | 0.0485  |
| VGN              | 0.0455                                                                           | 0.0607  | 0.0638  | 0.0413  | 0.0474  | 0.0485  |

480

Table S7. Root mean square errors of the parameter fits for the sandy soils (A3 and A4 soils according to Twarakavi et al., 2010)

| Parameterization | Soil (UNSODA identifier and classification according to Twarakavi et al. (2010)) |        |         |         |         |         |
|------------------|----------------------------------------------------------------------------------|--------|---------|---------|---------|---------|
|                  | 1120 A3                                                                          | 1143A3 | 2110 A3 | 2132 A3 | 1121 A4 | 1133 A4 |
| BCO              | 0.0926                                                                           | 0.0501 | 0.0507  | 0.0356  | 0.1288  | 0.0803  |
| FSB              | 0.0926                                                                           | 0.0500 | 0.0507  | 0.0292  | 0.1054  | 0.0700  |
| RNA              | 0.0926                                                                           | 0.0500 | 0.0507  | 0.0356  | 0.1288  | 0.0775  |
| VGA              | 0.0446                                                                           | 0.0334 | 0.0377  | 0.0203  | 0.0720  | 0.0175  |
| VGN              | 0.0446                                                                           | 0.0334 | 0.0377  | 0.0207  | 0.0720  | 0.0175  |

Table S8. Root mean square errors of the parameter fits for the sandy soils (A1 and A2 soils according to Twarakavi et al., 2010)

| Parameterization | Soil (UNSODA identifier and classification according to Twarakavi et al. (2010)) |         |         |
|------------------|----------------------------------------------------------------------------------|---------|---------|
|                  | 2126 A1                                                                          | 1142 A2 | 2104 A2 |
| BCO              | 0.0620                                                                           | 0.0990  | 0.0480  |
| FSB              | 0.0626                                                                           | 0.0990  | 0.0517  |
| RNA              | 0.0659                                                                           | 0.0989  | 0.0553  |
| VGA              | 0.0330                                                                           | 0.0250  | 0.0278  |
| VGN              | 0.0330                                                                           | 0.0252  | 0.0278  |

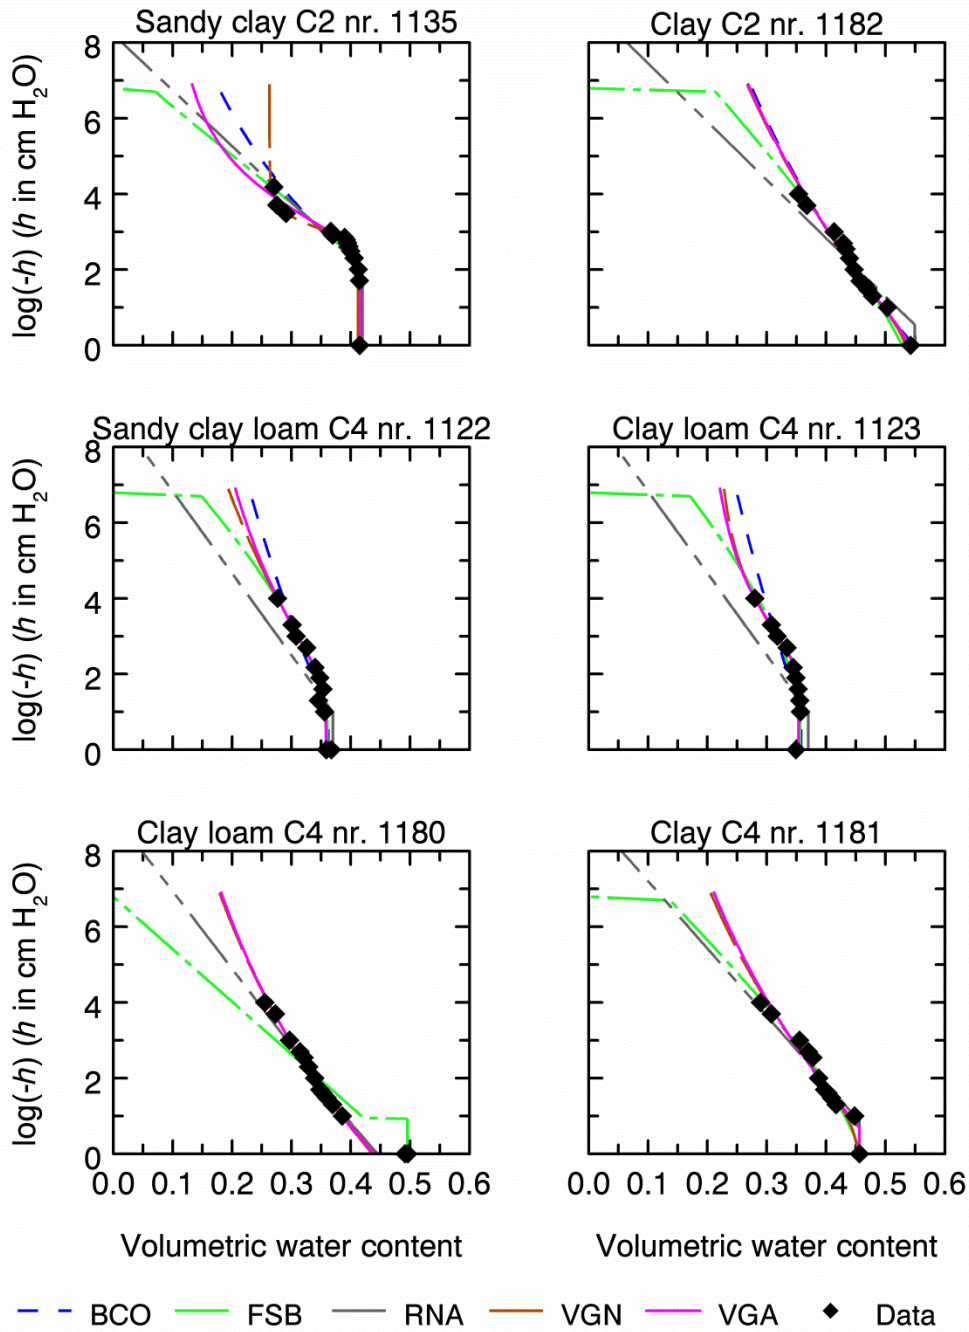



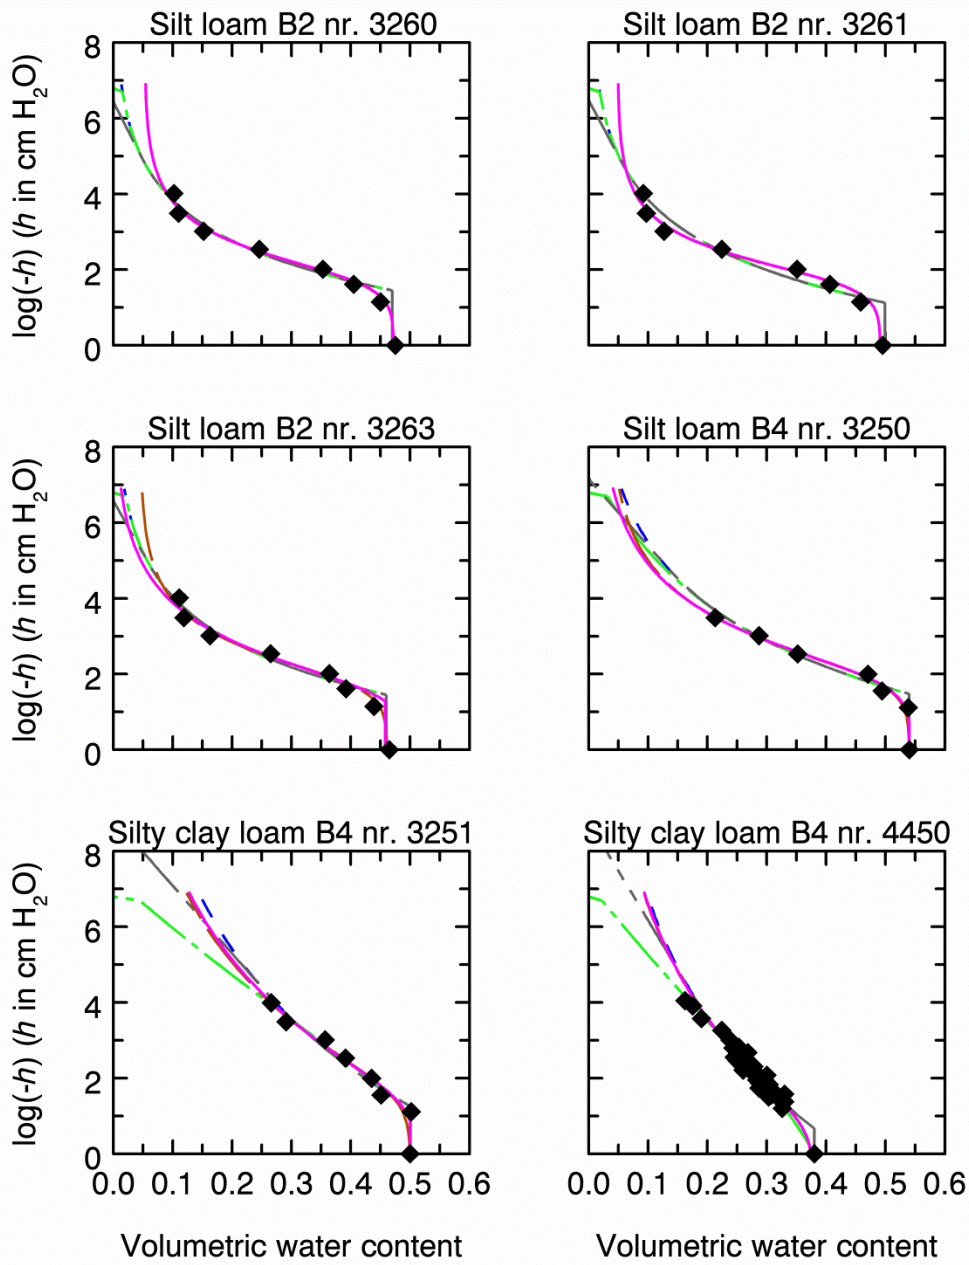

--- BCO    - - - FSB    — RNA    — VGN    — VGA    ◆ Data

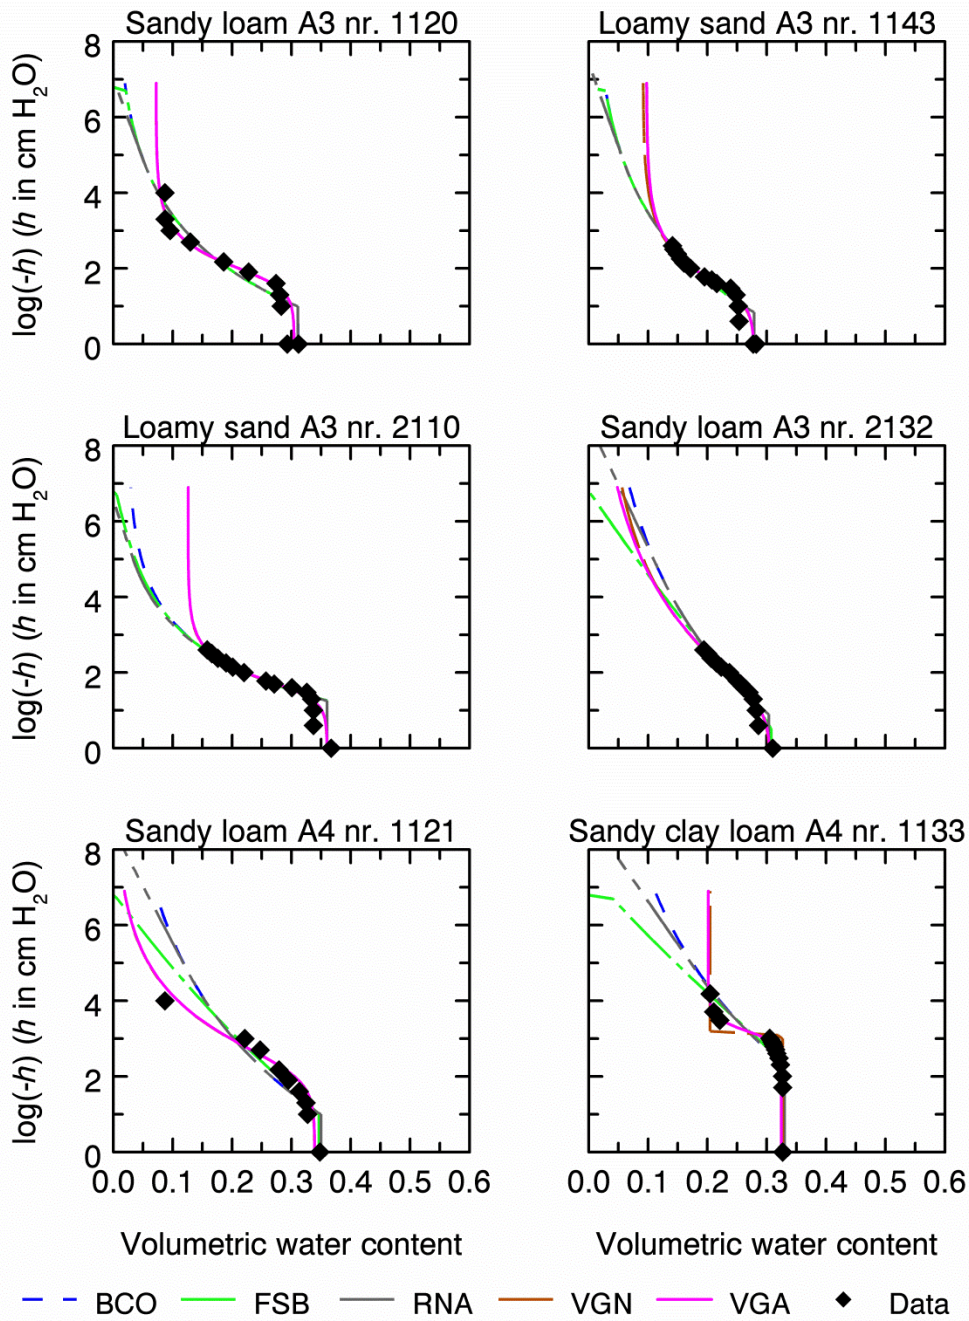

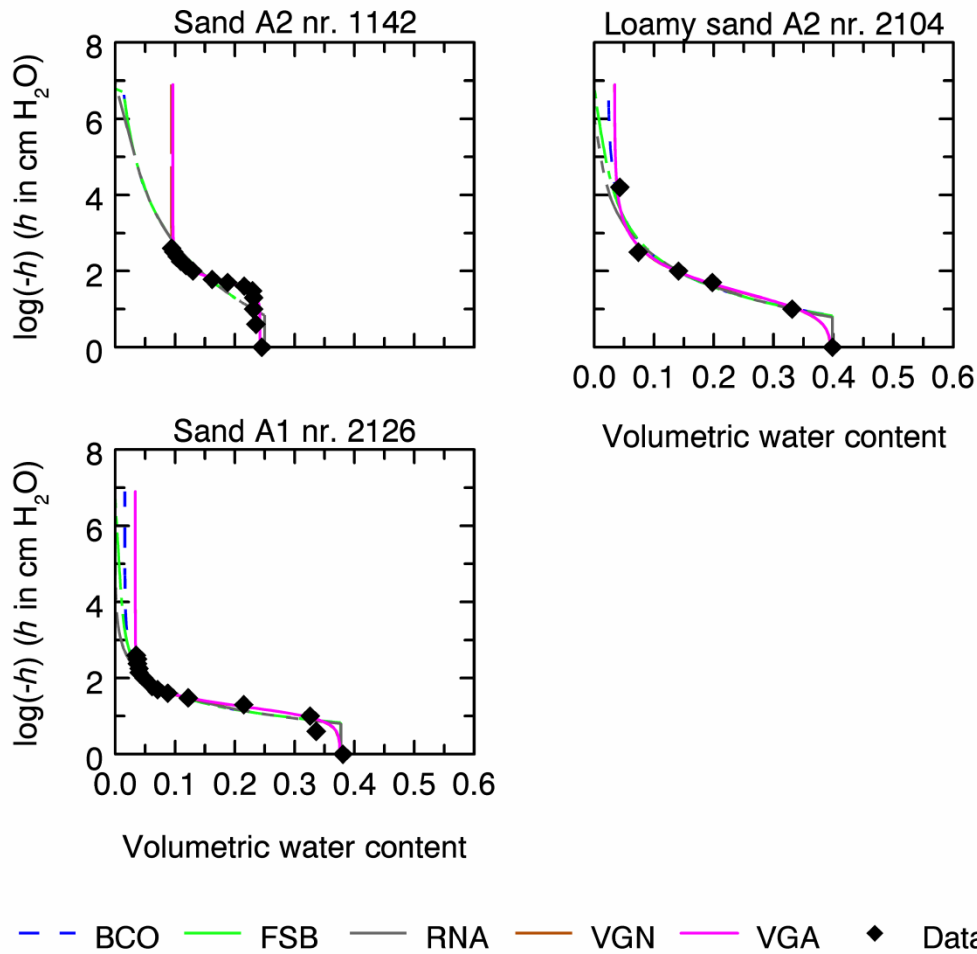

Figure S1. Fits of five parameterizations to data from 21 soils selected from the UNSODA database. The soils are characterized by their USDA texture classification and Twarakavi et al.'s (2010) classification, and identified by the four-digit number in the UNSODA database. The parameterizations are those of Brooks and Corey (1964) (BCO), Fayer and Simmons (1995) with the capillary bound water content forced to zero when the adsorbed water content reaches zero (FSB), Rossi and Nimmo (1994), but with a non-zero air-entry value (RNA), van Genuchten (1980) (VGN), and Ippisch et al. (2006) (VGA). Note that the vertical variation of the water content in samples at hydrostatic equilibrium was accounted for during the fitting process. The data in the wet range may therefore give a smoother representation than the underlying retention curve (Liu and Dane, 1995). N.B. Data points obtained at zero matric potential are plotted for  $pF = 0$  (corresponding to  $h = -1$  cm).
